# Supplementary material for: Use of simple analytical solutions in the calibration of Shallow Water Equations debris flow models
Source: Copernicus journal article supplement (doi:10.5194/egusphere-2024-2267), 2024-09-18
Supplement: Supplementary file 1 [file egusphere-2024-2267-supplement.pdf]

## Supplementary material:

# Use of simple analytical solutions in the calibration of Shallow Water Equations debris flow models

Bonomelli Riccardo<sup>1</sup>, Marco Pilotti<sup>1</sup>, Gabriele Farina<sup>1</sup>

5 <sup>1</sup>DICATAM, Università degli Studi di Brescia, Brescia, 25123, Italy

*Correspondence to:* Riccardo Bonomelli (riccardo.bonomelli@unibs.it)

### 1 Photo survey of the debris flow occurred in the Blè basin

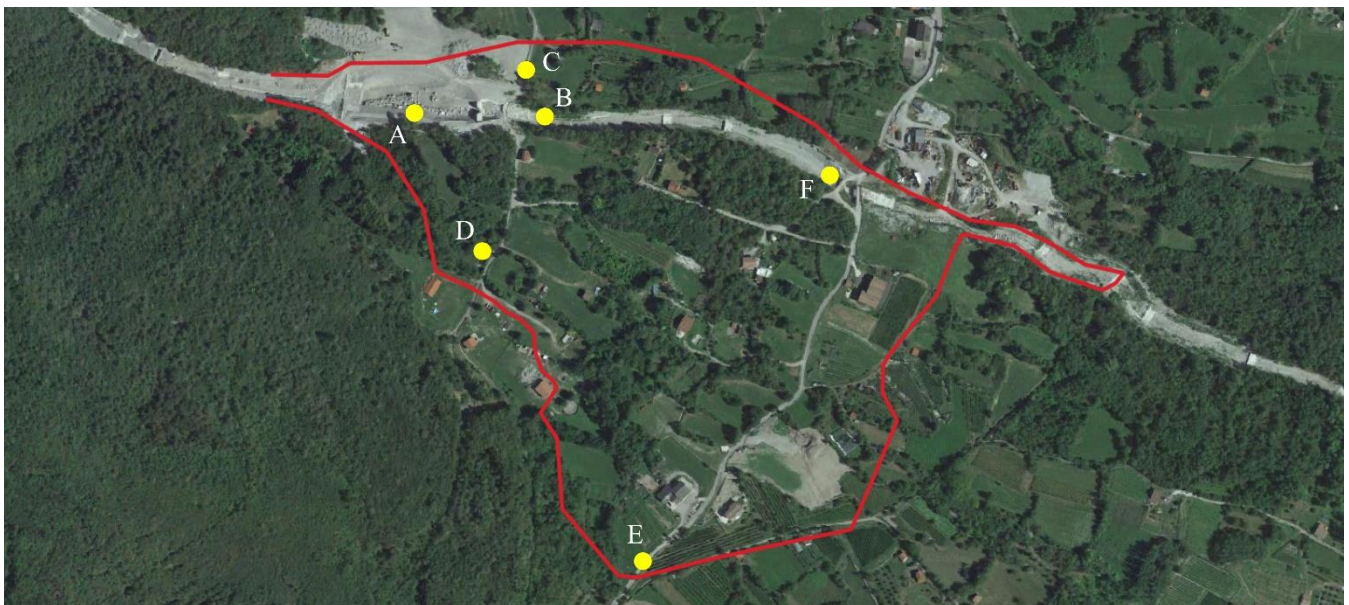

Figure 1. Map showing some photos taken after the debris flow event, (© Google Earth 2019).

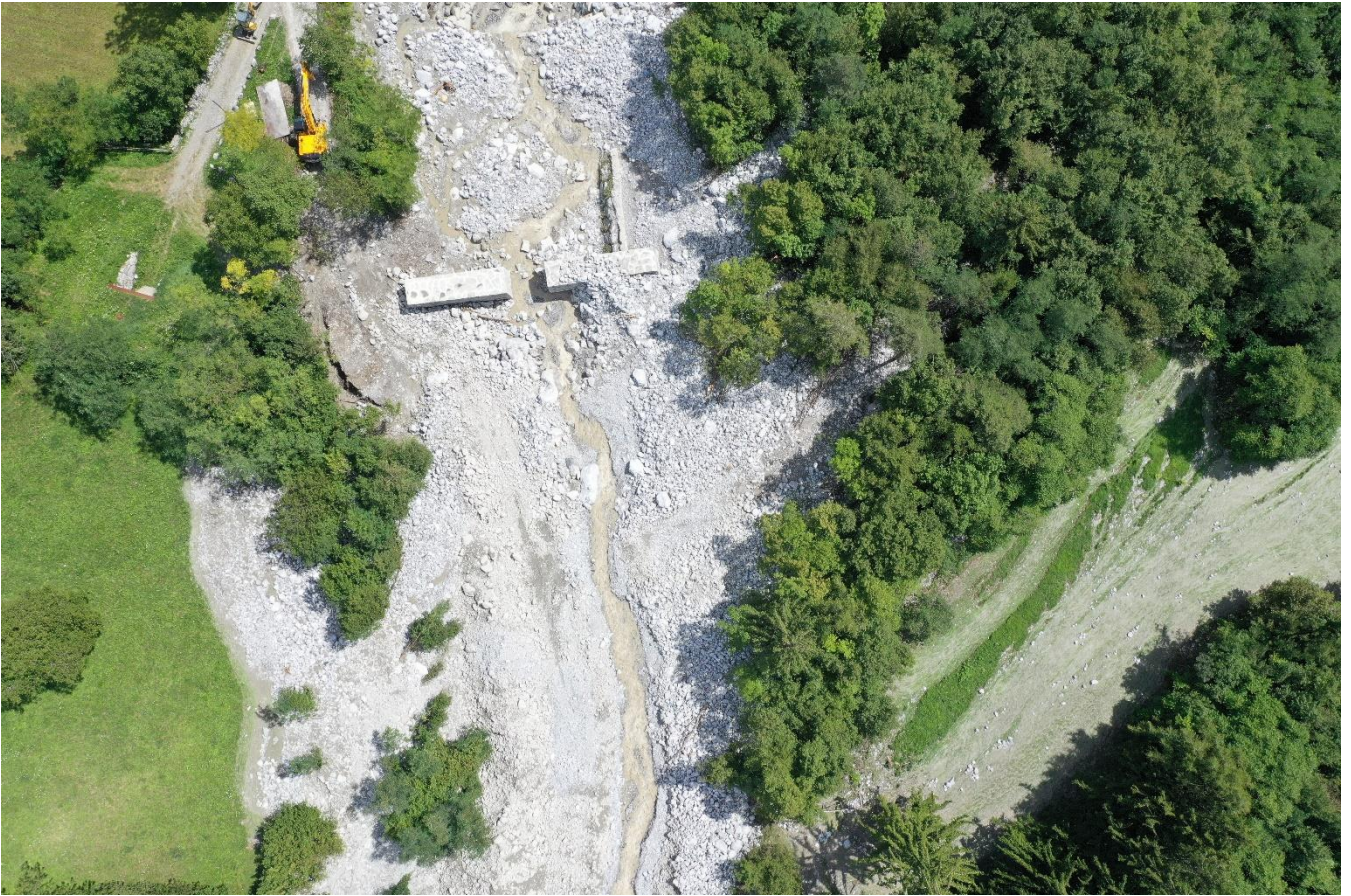

10

**Figure 2. Photo A.**

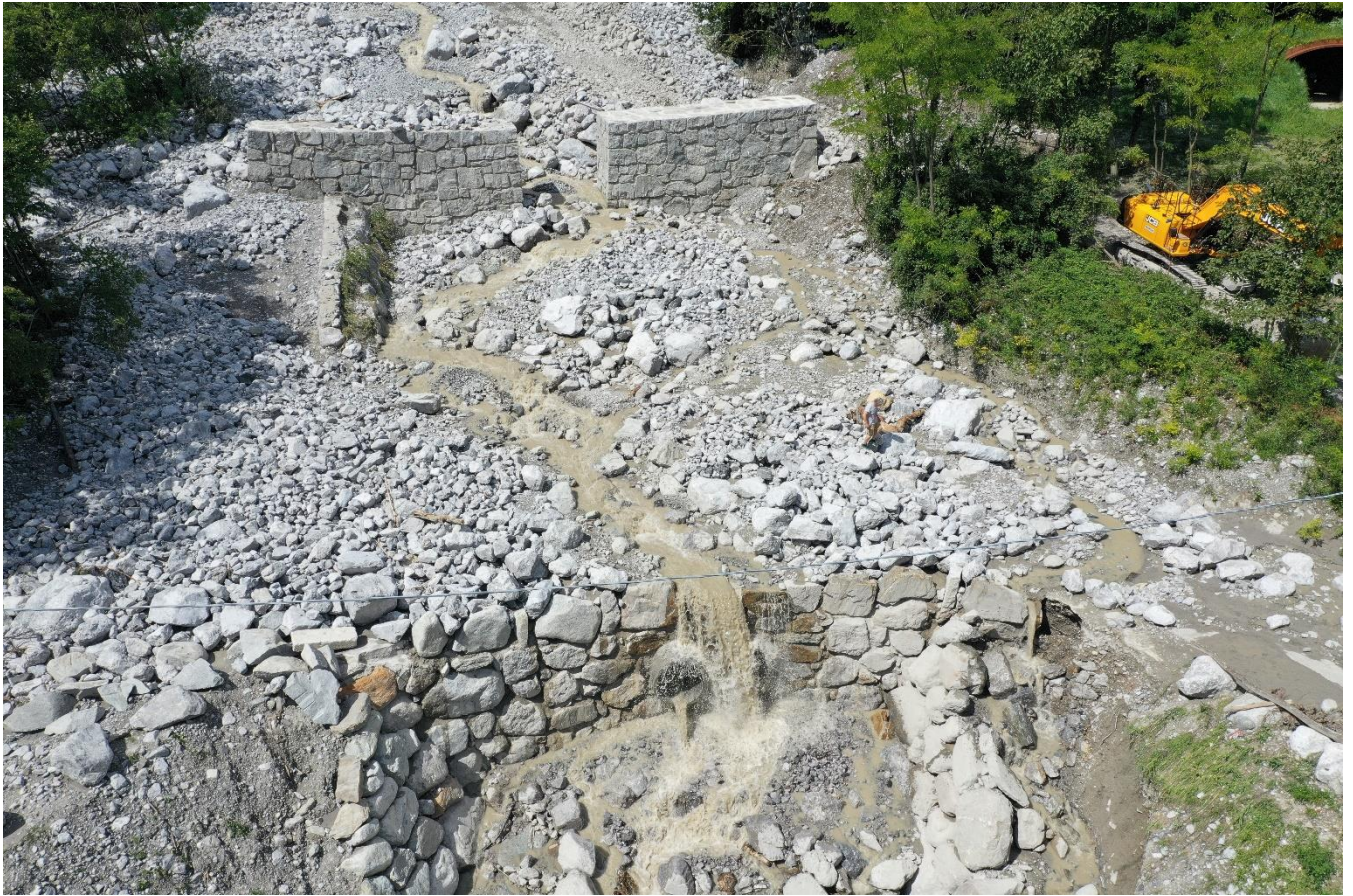

**Figure 3. Photo B.**

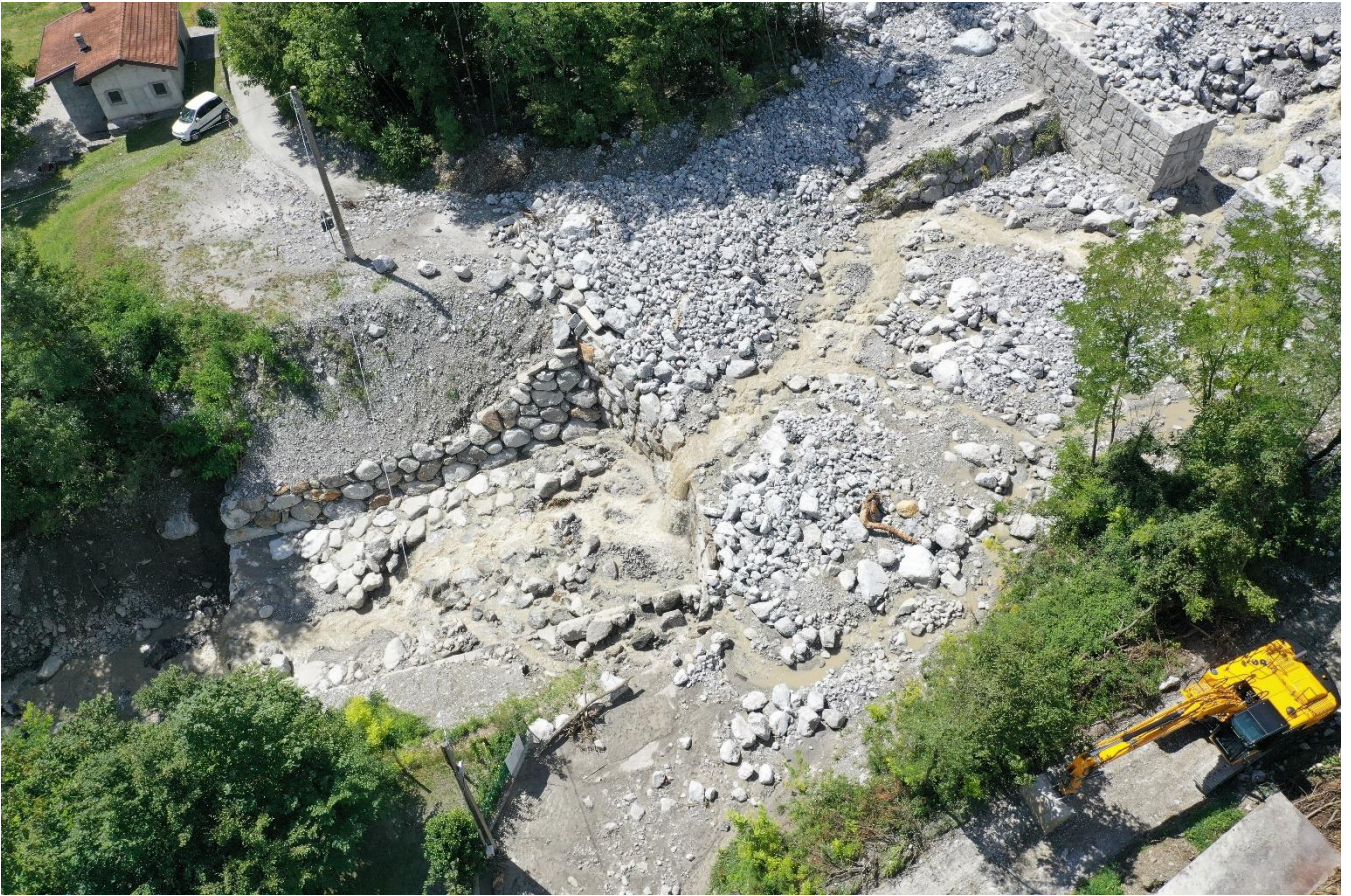

15 **Figure 4. Photo C.**

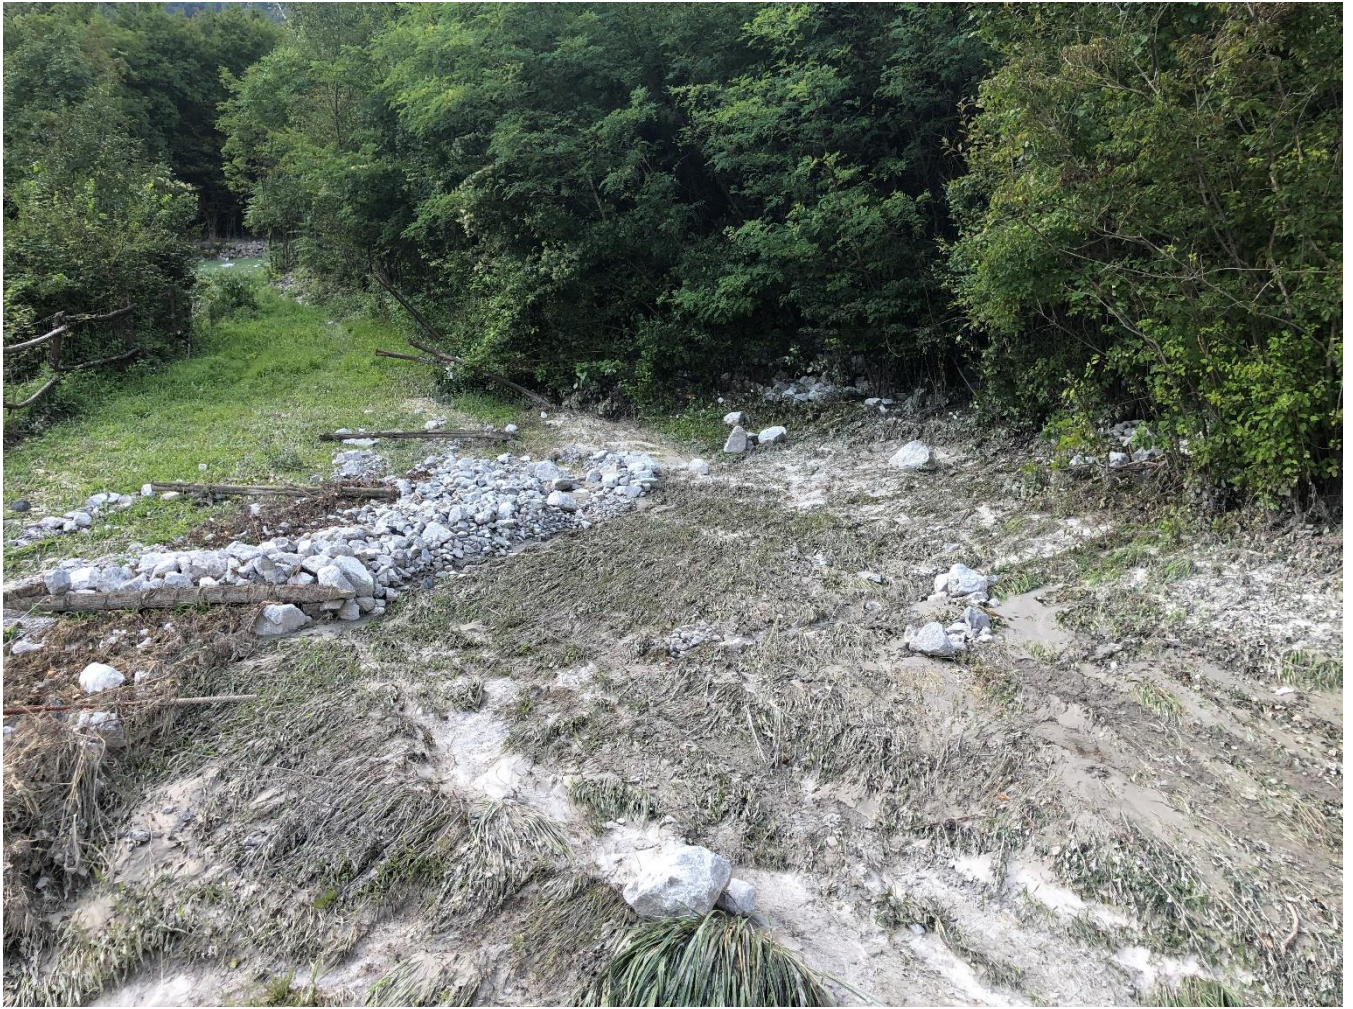

**Figure 5. Photo D.**

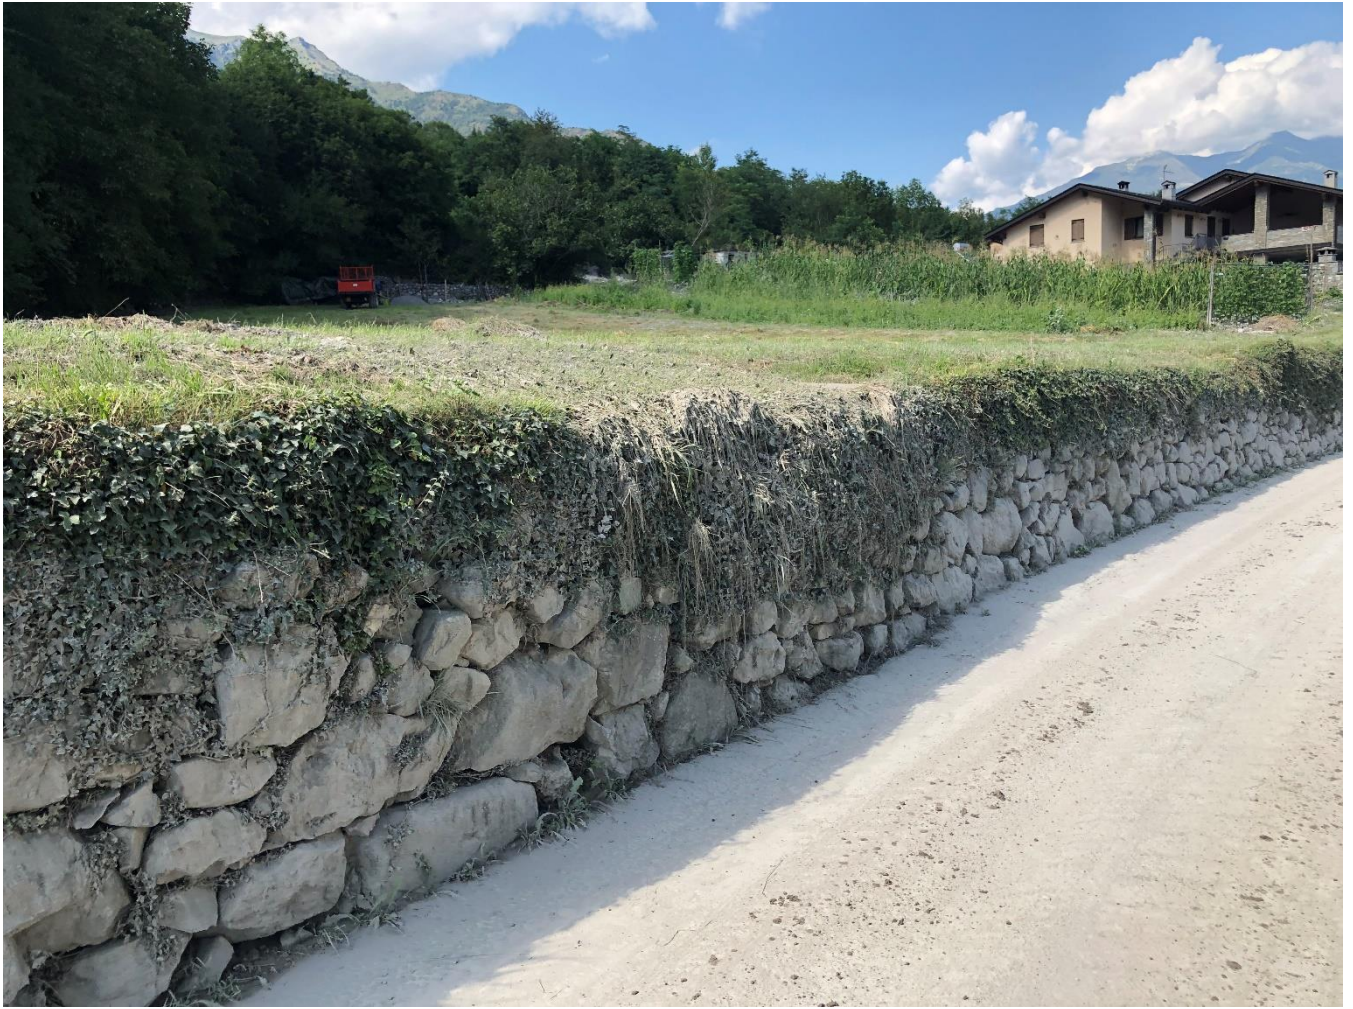

**Figure 6. Photo E.**

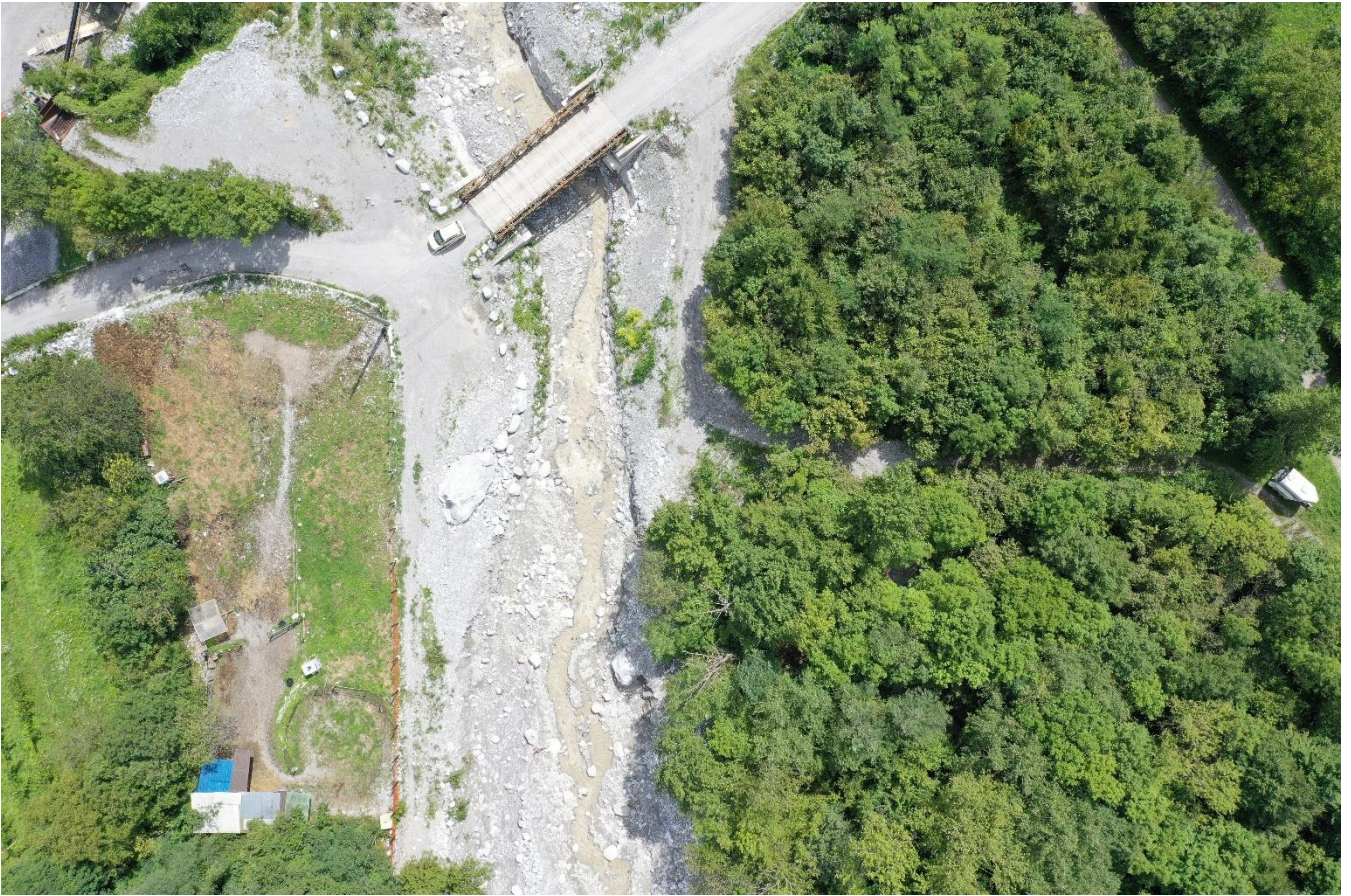

20

**Figure 7. Photo F.**
